# Supplementary material
Source: PubMed Central journal article supplement (PMC1253541)

Connectivity index

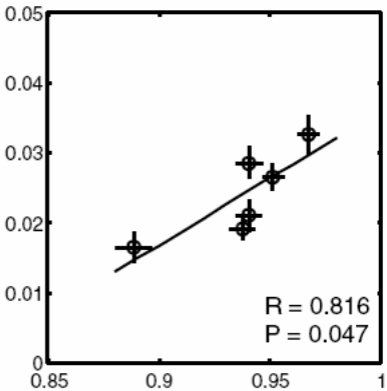

Accuracy

Supplement: pnas_0501684102_1.pdf [file pnas_0501684102_1.pdf]
